# Supplementary material
Source: PubMed Central journal article supplement (PMC3348582)
Supplement: NIHMS306942-supplement-3.pdf [file NIHMS306942-supplement-3.pdf]

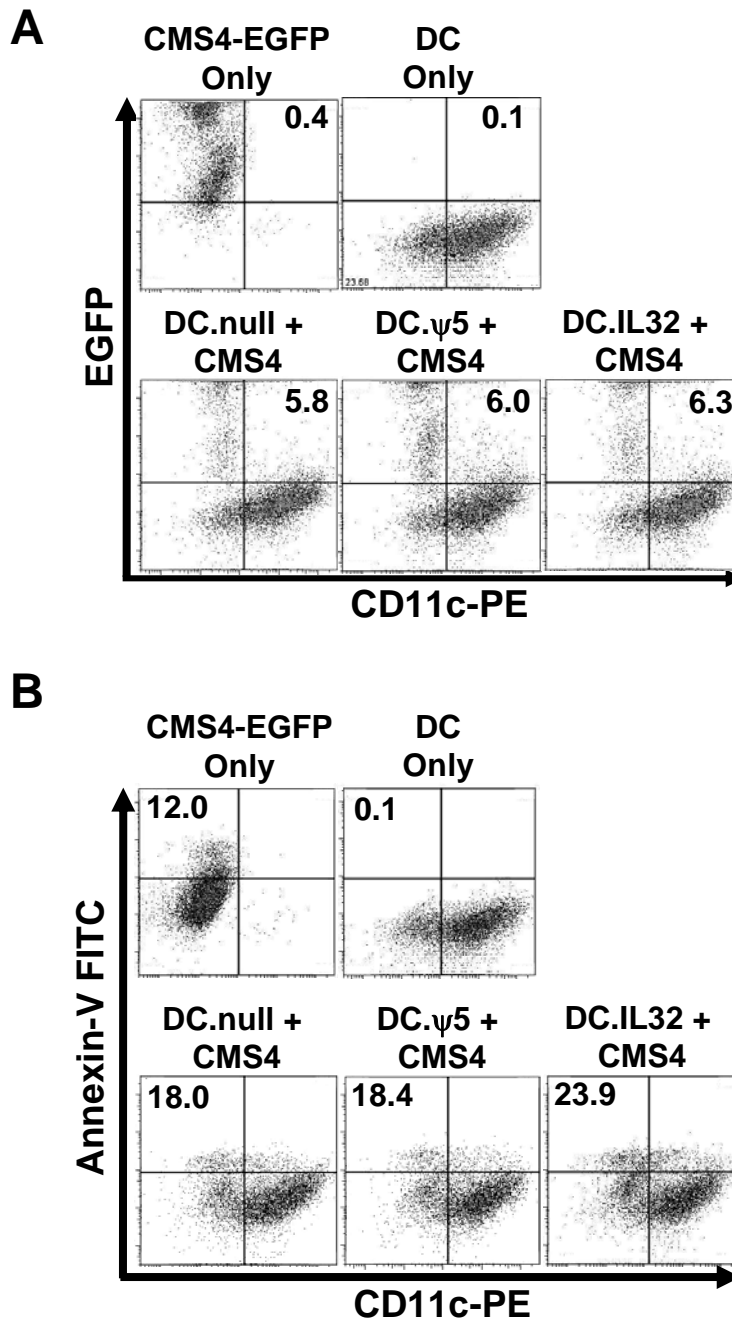

**Fig. S3. DC.IL32 appear unaltered in their capacity to uptake tumor-associated tumor cells or to mediate the apoptotic death of CMS4 cells in vitro.** **A.** The indicated DC were co-cultured with CMS4 tumor cells (that were pre-infected at an MOI of 50 for 48h with rAd.EGFP, kindly provided by the UPCI Vector Core facility) at a DC:Tumor cell ratio of 5:1. Cells were then stained with anti-CD11c APC mAb (e-Bioscience) and analyzed by flow cytometry. The ability of DC to uptake tumor material was assessed as double-positive events. Panel insert numbers reflect the percentage of double-positive DC among all DC evaluated. **B.** Unlabeled CMS4 cells were incubated with the indicated DC populations for 12h at a DC-to-tumor cell ratio of 5:1, after which cells were stained using Annexin-V FITC (BD Biosciences) and anti-CD11c APC. The inset numbers reflect the percentage of (pro)apoptotic tumor cells. Representative data are provided from 1 of 3 experiments performed.
