# Supplementary material
Source: PubMed Central journal article supplement (PMC3348582)
Supplement: NIHMS306942-supplement-5.pdf [file NIHMS306942-supplement-5.pdf]

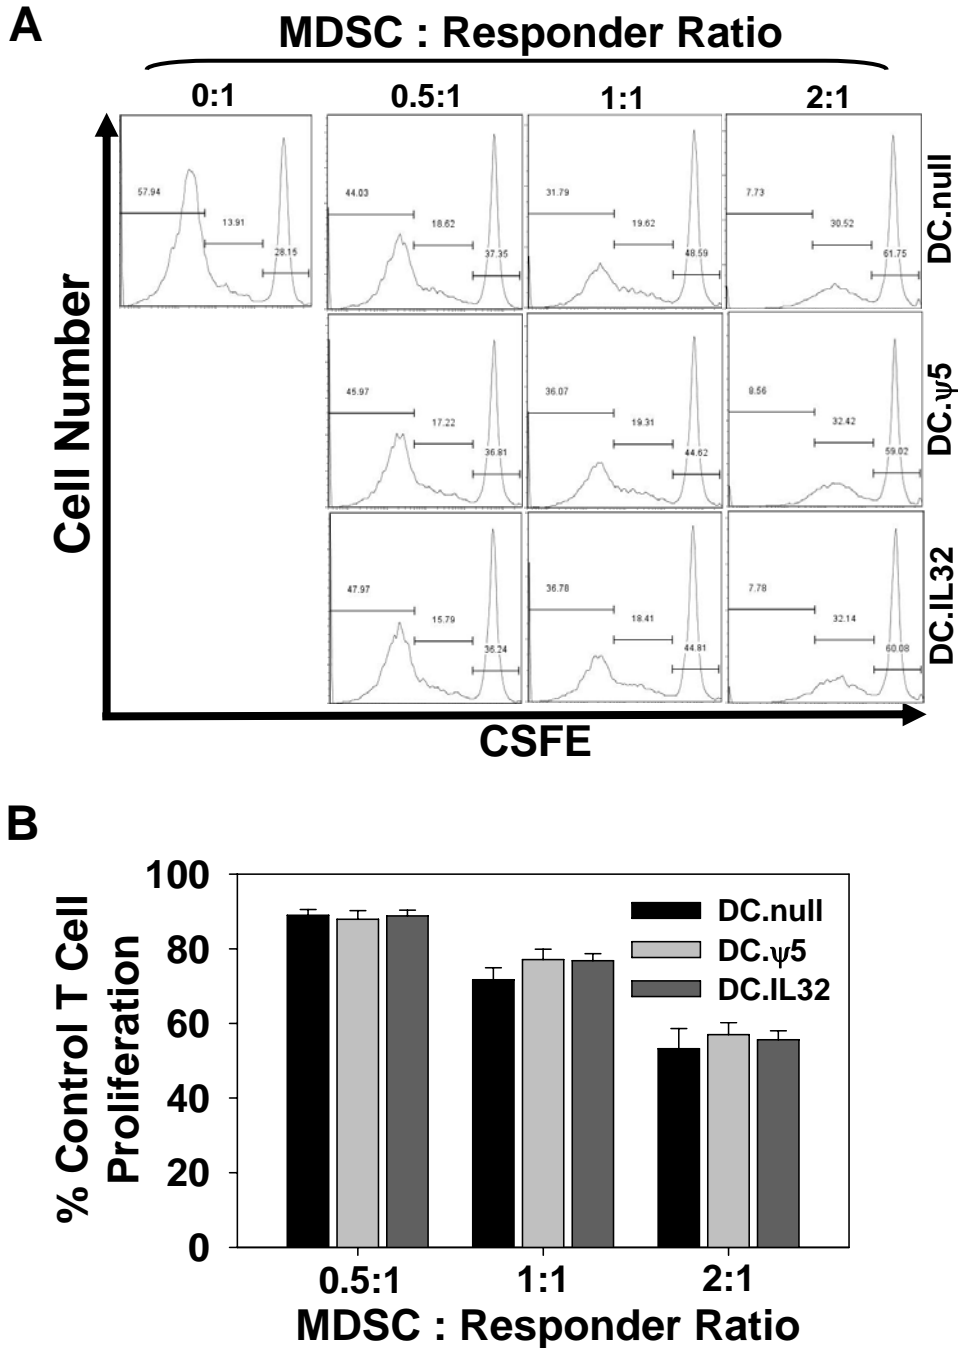

**Fig. S5. MDSC isolated from the tumors of mice treated with DC.IL32 retain immune suppressor function.** MLR were established using MACS CD4<sup>+</sup>CD25<sup>neg</sup> BALB/c splenocytes (pre-labeled with CFSE) and C57BL/6 DC.null stimulator cells as described in Materials and Methods. As indicated, flow-sorted CD11b<sup>+</sup>Gr1<sup>+</sup> MDSC isolated from day 21 tumors harvested from mice treated (per Fig. 5A) with i.t. DC.IL32 or control DC were added at the indicated MDSC-to-responder CD4<sup>+</sup> T cell ratios. **A**, after a 72h incubation period, CD4<sup>+</sup> T cell proliferation was analyzed based on CFSE dilution as monitored by flow cytometry as described in Materials and Methods. **B**, the percentage of control (no MDSC) CD4<sup>+</sup> T cell proliferation is reported. All inter-group differences were not significant. Data are from 1 representative experiment of 3 performed.
