# Supplementary material
Source: PubMed Central journal article supplement (PMC3348582)
Supplement: NIHMS306942-supplement-6.pdf [file NIHMS306942-supplement-6.pdf]

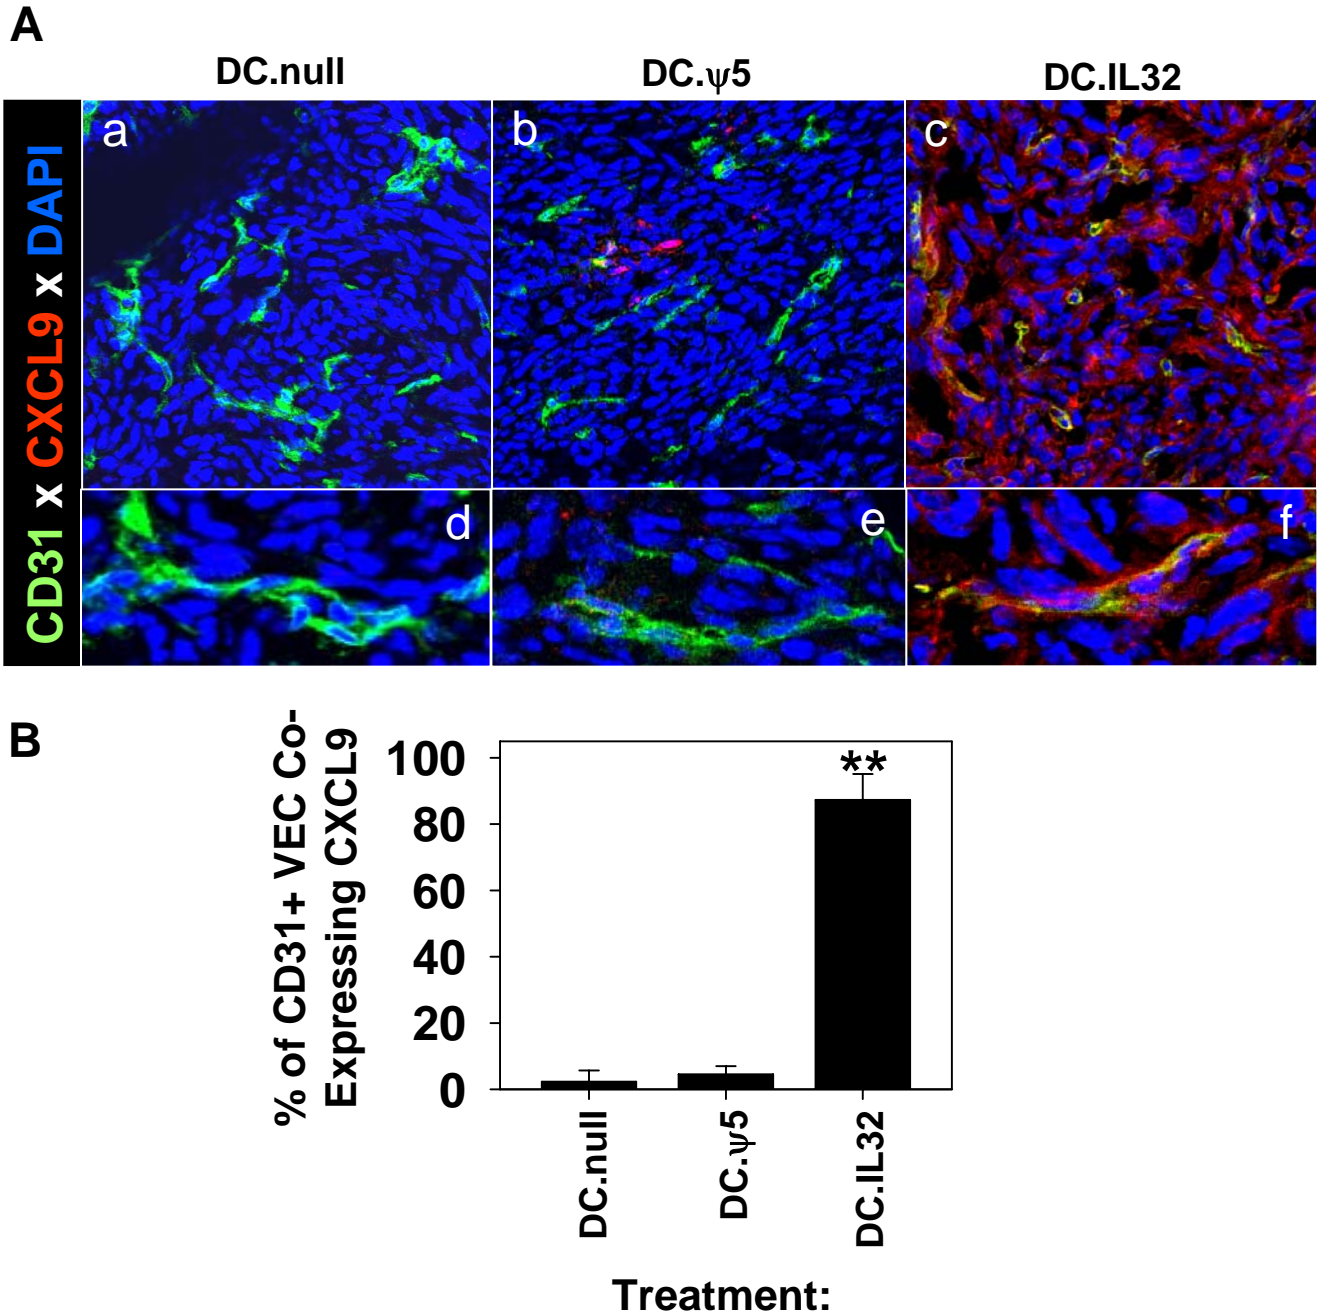

**Fig. S6. Intratumoral delivery of DC.IL32 promotes production of CXCL9 (Mig) from VEC and other stromal cells within the TME.** A., Tumor sections isolated from mice treated as outlined in Fig. 5A were stained for co-expression of CD31 and CXCL9 as described in Materials and Methods. Panels **Aa-Ac** at 40X magnification; panels **Ad-Af** at 100X magnification. B. The number of CD31<sup>+</sup>CXCL9<sup>+</sup> VEC cells was then enumerated for 10 high-power fields (40X), with data reported as the mean  $\pm$  SD number of cell/field. Data are representative of those obtained in 3 independent experiments. \*\*p < 0.01 versus DC.null or DC.ψ5 treatment groups.
